# Supplementary material for: High-Dose Exposure to Polymer-Coated Iron Oxide Nanoparticles Elicits Autophagy-Dependent Ferroptosis in Susceptible Cancer Cells
Source: MDPI journal article supplement (doi:10.3390/nano13111719), 2023-05-24
Supplement: s1 [file s1]

# Supporting information

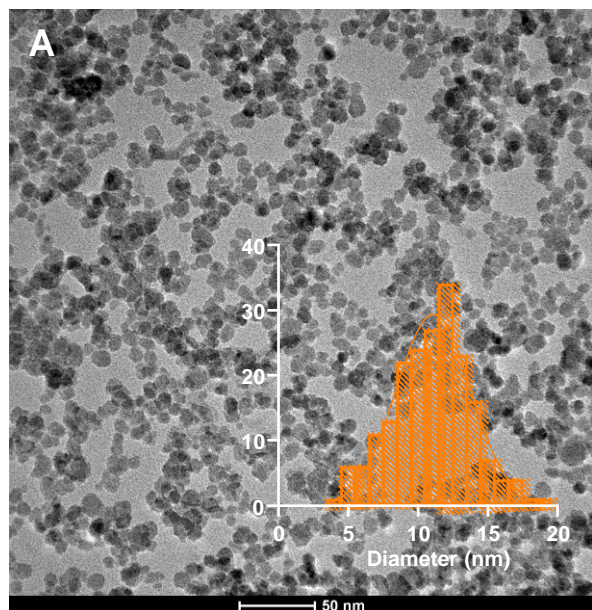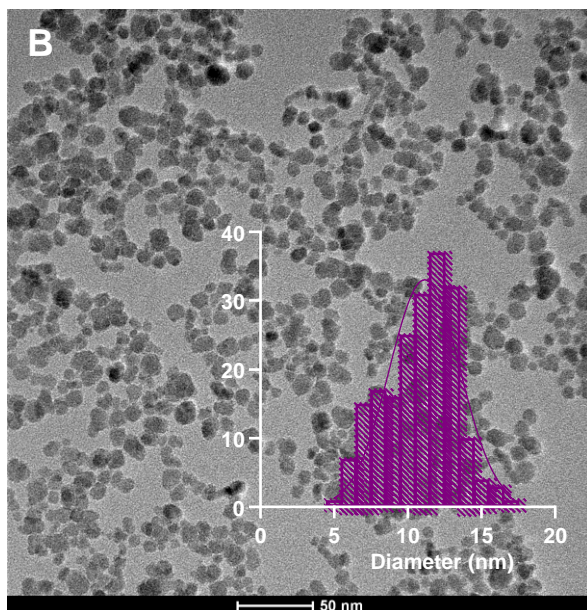

Figure S1. Characterization of  $\text{Fe}_2\text{O}_3$  nanoparticles. TEM micrographs of (A)  $\text{Fe}_2\text{O}_3$  and (B)  $\text{Fe}_2\text{O}_3$ -Co-PEG. The size distribution was obtained by counting at least 100 NPs. Scale bars: 50 nm.

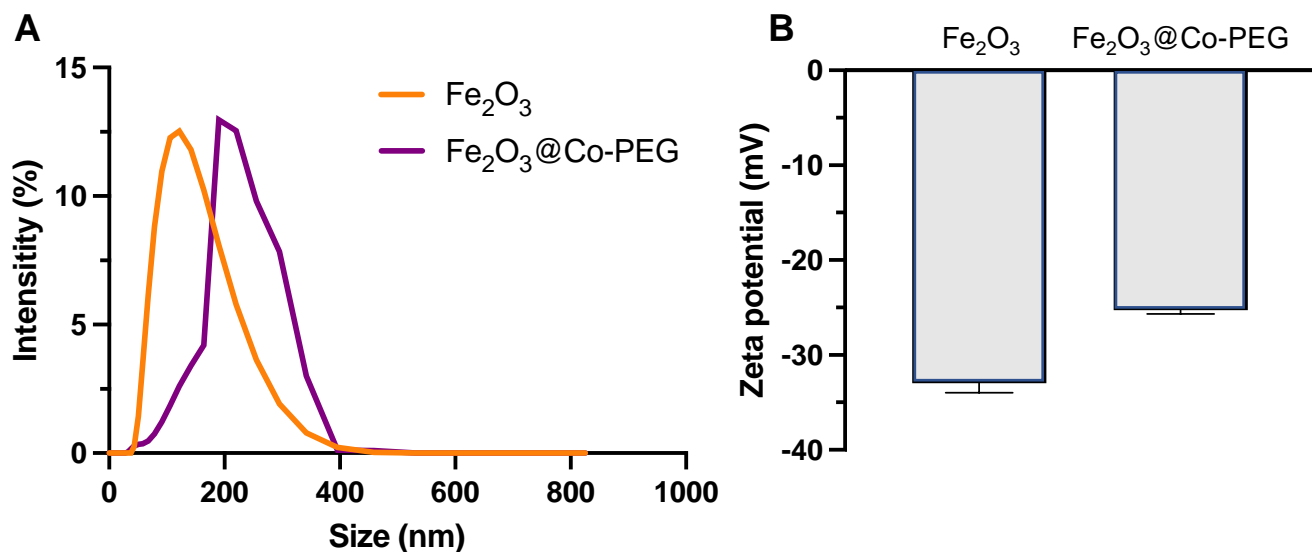

Figure S2. Characterization of  $\text{Fe}_2\text{O}_3$  nanoparticles. Hydrodynamic diameter (A) and zeta potential (B) of  $\text{Fe}_2\text{O}_3$  and  $\text{Fe}_2\text{O}_3\text{-Co-PEG}$  diluted in Milli-Q® water at 20  $\mu\text{g Fe/mL}$ . The measurements were performed by dynamic light scattering (DLS) using a Malvern Zetasizer Nano ZS.

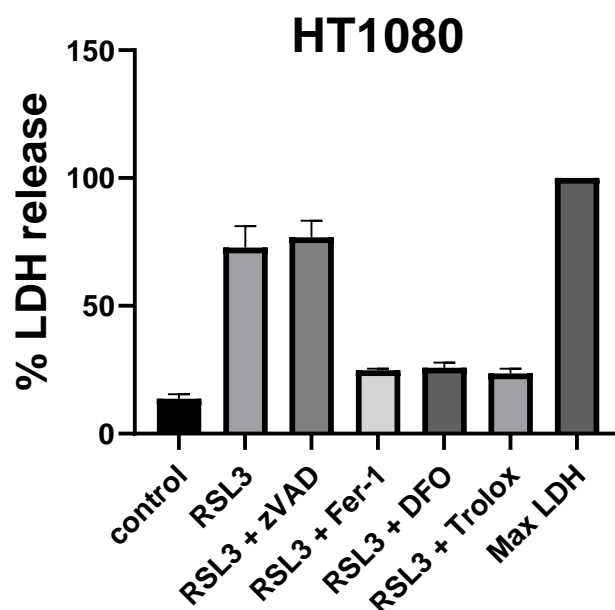

Figure S3. HT1080 cells are susceptible to ferroptosis. HT1080 cells were exposed to RSL3 (0.5  $\mu$ M) for 24 h and cell death was monitored using the LDH release assay. The pan-caspase inhibitor zVAD-fmk failed to rescue the cells indicating that cell death was non-apoptotic. On the other hand, ferrostatin-1 (antioxidant), DFO (iron-chelating agent), and Trolox (vitamin E analog) all blocked RSL3-induced cell death in this model. Data shown are mean values  $\pm$  S.E.M. (n=3).

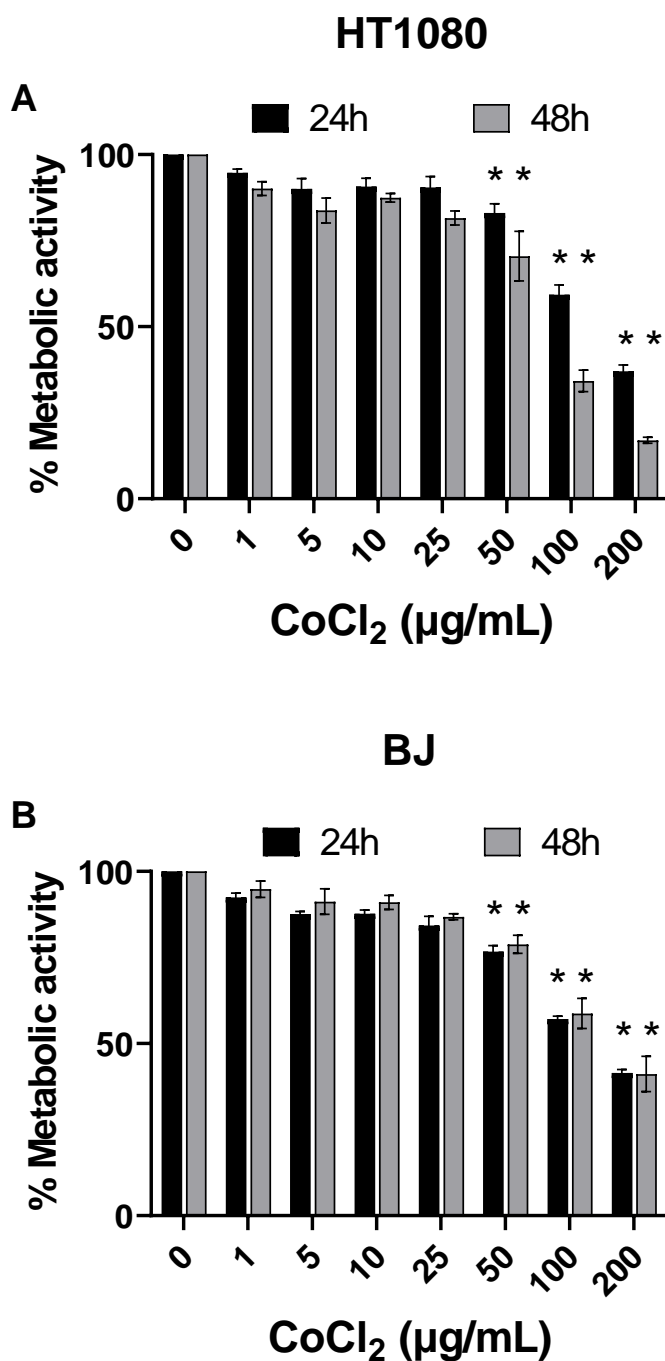

Figure S4. Cobalt chloride (CoCl<sub>2</sub>)-induced cytotoxicity. The Alamar Blue assay was used to determine the cytotoxicity of CoCl<sub>2</sub> towards (A) HT1080 cells and (B) BJ cells at 24 h and 48 h. The LDH release assay could not be used due to assay interference with CoCl<sub>2</sub> (data not shown). The data are shown as mean values  $\pm$  S.E.M. of three independent experiments. \*P < 0.05.

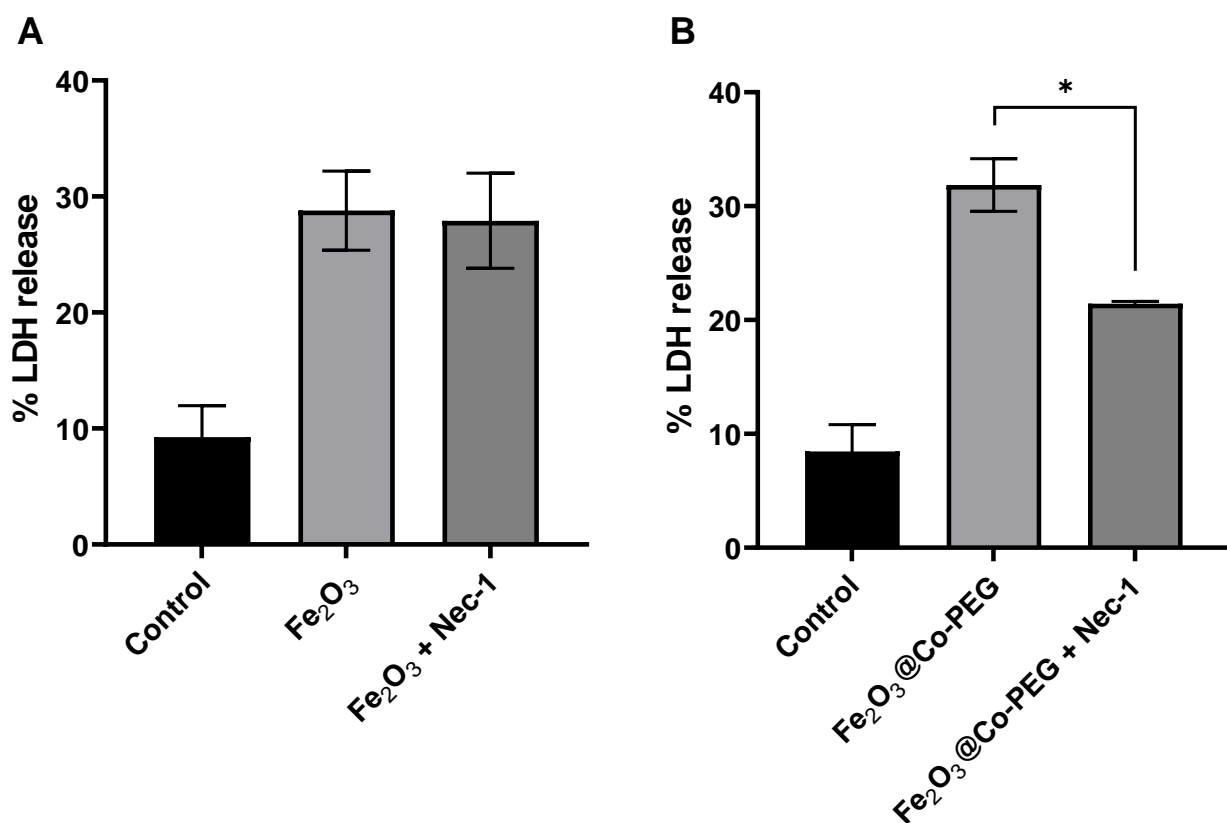

Figure S5. Evidence for necroptosis in cells exposed to Co-doped nanoparticles. HT1080 cells were exposed to a high concentration (400  $\mu\text{g}/\text{mL}$ ) of (A)  $\text{Fe}_2\text{O}_3$  nanoparticles and (B)  $\text{Fe}_2\text{O}_3$ @Co-PEG nanoparticles for 24 h with and without the pre-incubation for 30 min with the RIPKI inhibitor, necrostatin-1 (30  $\mu\text{M}$ ). The values for the control samples and nanoparticles alone in panel A and B are identical to the values shown in Figure 4A and B. The data are shown as mean values  $\pm$  S.E.M. of three independent experiments. \* $P < 0.05$ .

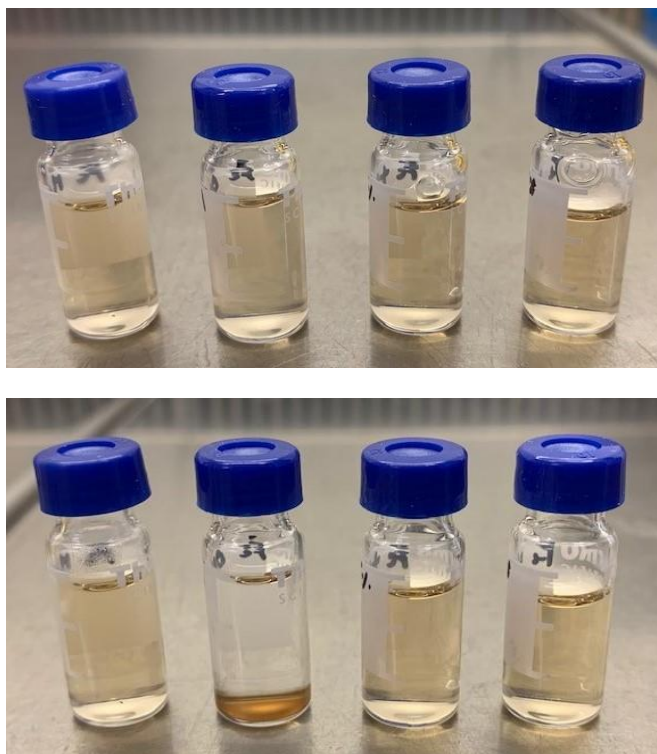

Figure S6. Characterization of Fe<sub>3</sub>O<sub>4</sub>-PEG-PLGA nanoparticles. The nanoparticles were diluted at 25 µg/mL in water or in cell culture medium (CCM) supplemented with 5 or 10% fetal bovine serum (FBS) and photographs were taken at 0 h (top row) and at 24 h (bottom row) to provide visual evidence of the stability of the dispersions. Samples from left to right: Fe<sub>3</sub>O<sub>4</sub>-PEG-PLGA in H<sub>2</sub>O, CCM, CCM+5% FBS, CCM+10% FBS.

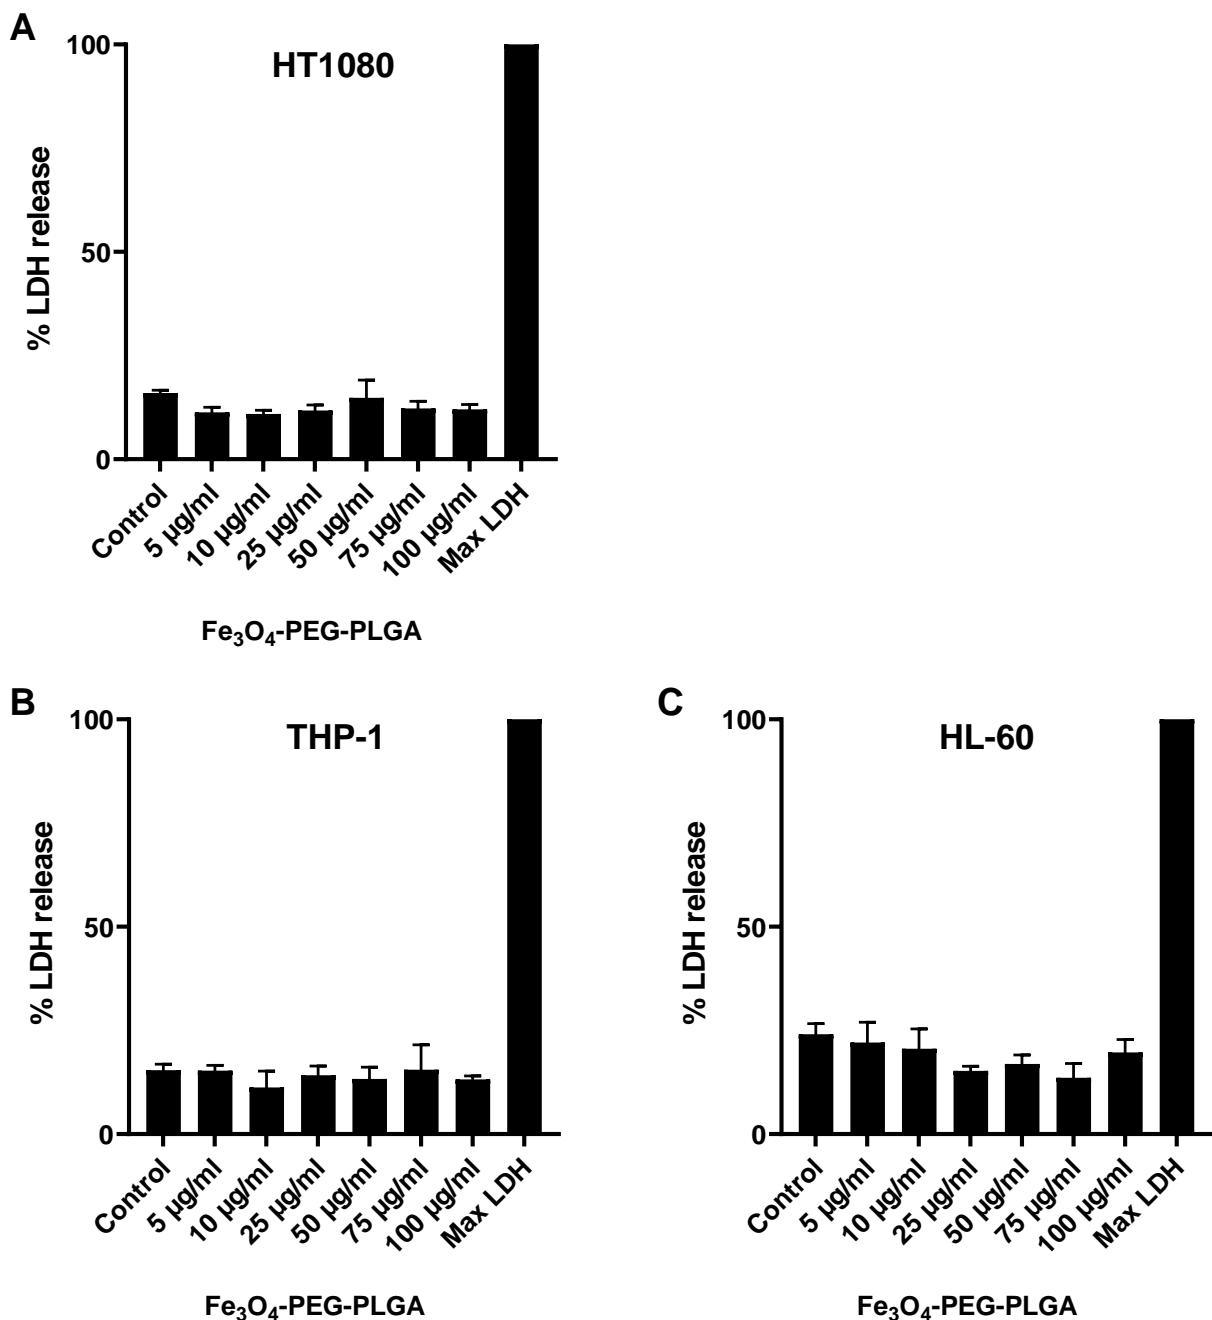

Figure S7. No cytotoxicity observed for  $\text{Fe}_3\text{O}_4\text{-PEG-PLGA}$  nanoparticles. The potential cytotoxicity was investigated using (A) HT1080 fibrosarcoma cells, (B) macrophage-differentiated THP-1 cells, and (C) neutrophil-differentiated HL-60 cells. Cells were exposed to the indicated concentrations for 24 h and cytotoxicity was determined using the LDH release assay. The data are shown as mean values  $\pm$  S.D. of three independent experiments. \* $P < 0.05$ .
